# Supplementary material for: Machine learning in chemical reaction space
Source: PubMed Central journal article supplement (PMC7603480; doi:10.1038/s41467-020-19267-x), 2020-10-30
Supplement: 41467_2020_19267_MOESM2_ESM.pdf [file 41467_2020_19267_MOESM2_ESM.pdf]

## **Description of Additional Supplementary Files**

File Name: Supplementary Data 1

Description: DFT reference data, molecular geometries, regression model coefficients, farthest point sampling splits.
